# Supplementary material
Source: PubMed Central journal article supplement (PMC4892372)
Supplement: NIHMS787045-supplement-appendix.pdf [file NIHMS787045-supplement-appendix.pdf]

## Supplementary Appendix

This appendix has been provided by the authors to give readers additional information about their work.

Supplement to: Naggie S, Cooper C, Saag M, et al. Ledipasvir and sofosbuvir for HCV in patients coinfecting with HIV-1. *N Engl J Med*. DOI: 10.1056/NEJMoa1501315

# Supplementary Appendix

This appendix has been provided by the authors to give readers additional information about their work.

Supplement to: Naggie S, Cooper C, Saag M, et al. Ledipasvir and Sofosbuvir for HCV in Patients Coinfected with HIV-1.

## Table of contents

|                                                                                                 |    |
|-------------------------------------------------------------------------------------------------|----|
| ION-4 Study Investigators                                                                       | 3  |
| Renal monitoring                                                                                | 5  |
| Pharmacokinetic analyses                                                                        | 5  |
| Table S1. Reasons for screen failure                                                            | 6  |
| Figure S1. Patient disposition                                                                  | 7  |
| Table S2. Prior HCV treatment and response                                                      | 8  |
| Table S3. SVR12 by subgroup                                                                     | 9  |
| Figure S2. Rates of sustained virologic response by subgroup and baseline factors               | 11 |
| Table S4. Characteristics of patients who did not achieve SVR                                   | 12 |
| Table S5. SVR12 by race and antiretroviral regimen                                              | 13 |
| Table S6. Univariate analysis                                                                   | 14 |
| Table S7. Multivariate analysis                                                                 | 14 |
| Table S8. Serious adverse events                                                                | 15 |
| Table S9. Grade 3 and 4 laboratory abnormalities                                                | 16 |
| Figure S3. Creatinine clearance                                                                 | 19 |
| Details regarding patients developed lab abnormalities consistent with worsening renal function | 20 |
| Table S10. Pharmacokinetic parameters of ledipasvir, sofosbuvir, GS-331007, and tenofovir       | 22 |

## **ION-4 Study Investigators**

### **Canada**

Curtis Cooper, *The Ottawa Hospital*; Mark Hull, *St Paul's Hospital, Vancouver*; Marina Klein, *McGill University*; David Wong, *Toronto General Hospital*; Emmanuelle Huchet, *Clinique Medicale l'Actuel*

### **New Zealand**

Edward Gane, *Auckland Clinical Studies Limited*; Catherine Stedman, *Christchurch Clinical Studies Trust*

### **United States**

David Asmuth, *University of California-UC Davis*; Norbert Brau, *Bronx VA Medical Center / Mt. Sinai School of Medicine*; Raymond Chung, *Massachusetts General Hospital*; Eric Daar, *UCLA David Geffen School of Medicine / Harbor-UCLA Ronald Regan Medical Center*; Craig Dietz, *Kansas City Free Health Clinic*; Robin Henry Dretler, *Infectious Disease Specialists of Atlanta*; Richard Elion, *Whitman Walker Health*; W.J. Fessel, *Kaiser Permanente*; Joseph C. Gathe, *Therapeutic Concepts, PA*; Eliot Godofsky, *Bach & Godofsky Infectious Diseases*; Federico Hinestrosa, *Orlando Immunology Center*; Gregory Huhn, *The Ruth M. Rothstein CORE Center*; Mamta Jain, *UT Southwestern Medical Center*; Dushyantha Jayaweera, *University of Miami*; Jay Lalezari, *Quest Clinical Research*; Charles Landis, *Harborview Medical Center*; Cynthia Mayer, *St. Joseph's Comprehensive Research Institute*; Javier O. Morales-Ramirez, *Clinical Research Puerto Rico Inc*; Karam Mounzer, *Philadelphia FIGHT*; Bruce S. Rashbaum, *Capital Medical Associates, P.C.*; Peter J. Ruane, *Peter J Ruane MD Inc*; Jorge L. Santana-Bagur, *Universidad de Puerto Rico Recinto de Ciencias Medicas*; Paul Edward Sax, *Brigham and Women's Hospital*; Richard Sterling, *VCU Medical Center*; Mark Sulkowski, *Johns Hopkins Hospital/University*; Melanie A. Thompson, *AIDS Research Consortium of Atlanta*; Chia Wang, *Virginia Mason Medical Center*; Kimberly Workowski, *Emory Healthcare*; Benjamin Young, *Apex Research Institute*; Maurizio Bonacini, *Saint Luke's Hospital*; Donald Kotler, *St. Luke's Roosevelt Hospital*; Anthony Mills, *Southern California Men's Medical Group*; William J. Towner, *Kaiser Permanente*; David A. Wohl, *University of North Carolina at Chapel Hill / UNC School of Medicine*; David Wyles, *University of California San Diego*; Kristen Marks, *Weill*

*Cornell Medical College; Rachel Baden, Beth Israel Deaconess Medical Center; Philip M. Grant, Stanford University; Michael Saag, The University of Alabama at Birmingham; Laura Salazar, Orange Coast Medical Group; Meena Bansal, Mount Sinai Medical Center; Amy Colson, Community Research Initiative of New England; Joel E. Gallant, Southwest CARE Center; Marc Siegel, The George Washington University Medical Center; Susanna Naggie, Duke University; Annie Luetkemeyer, San Francisco General Hospital; Karen T. Tashima, The Miriam Hospital; Kenneth Sherman, University of Cincinnati; Jason Flamm, Kaiser Permanente; Fritz Bredeek, Metropolis Medical Group; Pablo Tebas, University of Pennsylvania; David A. Wheeler, Clinical Alliance for Research & Education – Infectious Diseases; Timothy Friel, Lehigh Valley Health Network*

## **Renal Monitoring**

Renal monitoring included serum creatinine, potassium, phosphate, bicarbonate, uric acid, urine beta-2 microglobulin, urine retinol binding protein, and urinalysis.

Although there was no clinically relevant interaction with atazanavir/ritonavir or darunavir/ritonavir alone and ledipasvir-sofosbuvir in healthy volunteer studies, we anticipated the potential for additional increase of tenofovir exposure in patients taking these drug combinations. Since drug interaction studies were not complete at the time of study initiation, antiretroviral regimens containing ritonavir-boosted HIV-1 protease inhibitors and cobicistat were not allowed.

## **Pharmacokinetic Analyses**

Fifty-six patients enrolled in the pharmacokinetic substudy, for which intensive serial pharmacokinetic samples were collected over 24 hours between the week 2 and week 8 on-treatment visits. The population pharmacokinetic parameters for ledipasvir, sofosbuvir, GS-331007, and tenofovir were computed for all patients from concentration data from intensive and/or sparse samples using the previously established population pharmacokinetic models.\*

\*Kirby B, et al. Population pharmacokinetics of sofosbuvir and its major metabolite (GS-331007) in healthy and HCV-infected adult subjects. AASLD 2013.

Kirby B, et al. Population pharmacokinetics analysis of ledipasvir (GS-5885) in healthy and hepatitis C virus-infected subjects. IWCPHHT, 2014.

**Table S1. Reasons for screen failure**

|                                                                          |                |
|--------------------------------------------------------------------------|----------------|
| Screened Patients                                                        | 429            |
| Patients Rescreened                                                      | 1              |
| Screen Failure Patients                                                  | 94/429 (21.9%) |
| Screen Failure Patients Who Did Not Meet Eligibility Criteria            | 91/94 (96.8%)  |
| Inclusion Criterion 13: Within specified laboratory ranges               | 49/91 (53.8%)  |
| Exclusion Criterion 6: Clinically-relevant alcohol or drug abuse         | 20/91 (22.0%)  |
| Inclusion Criterion 5: HCV GT1, 4                                        | 10/91 (11.0%)  |
| Inclusion Criterion 8: HIV RNA <50 copies/mL, on protocol-approved ARV   | 5/91 (5.5%)    |
| Inclusion Criterion 11: Liver imaging for HCC in patients with cirrhosis | 5/91 (5.5%)    |
| Exclusion Criterion 2: HBV infection                                     | 4/91 (4.4%)    |
| Inclusion Criterion 16: Good general health                              | 3/91 (3.3%)    |
| Inclusion Criterion 17: Able to comply with study requirements           | 3/91 (3.3%)    |
| Exclusion Criterion 1: Clinically-significant illness other than HCV/HIV | 3/91 (3.3%)    |
| Inclusion Criterion 4: HCV RNA $\geq 10^4$ IU/mL at screening            | 2/91 (2.2%)    |
| Inclusion Criterion 10: Cirrhosis status determination                   | 2/91 (2.2%)    |
| Inclusion Criterion 1: Signed ICF                                        | 1/91 (1.1%)    |
| Inclusion Criterion 3: Body Mass Index(BMI) $\geq 18$ kg/m <sup>2</sup>  | 1/91 (1.1%)    |
| Inclusion Criterion 9: Chronic HCV                                       | 1/91 (1.1%)    |
| Screen Failure Patients Who Met Eligibility Criteria                     | 3/94 (3.2%)    |
| Reasons for Non-Enrollment of Patients Who Met Eligibility Criterion     |                |
| Withdrew Consent                                                         | 2/3 (66.7%)    |
| Lost to Follow-Up                                                        | 1/3 (33.3%)    |

**Figure S1. Patient disposition**

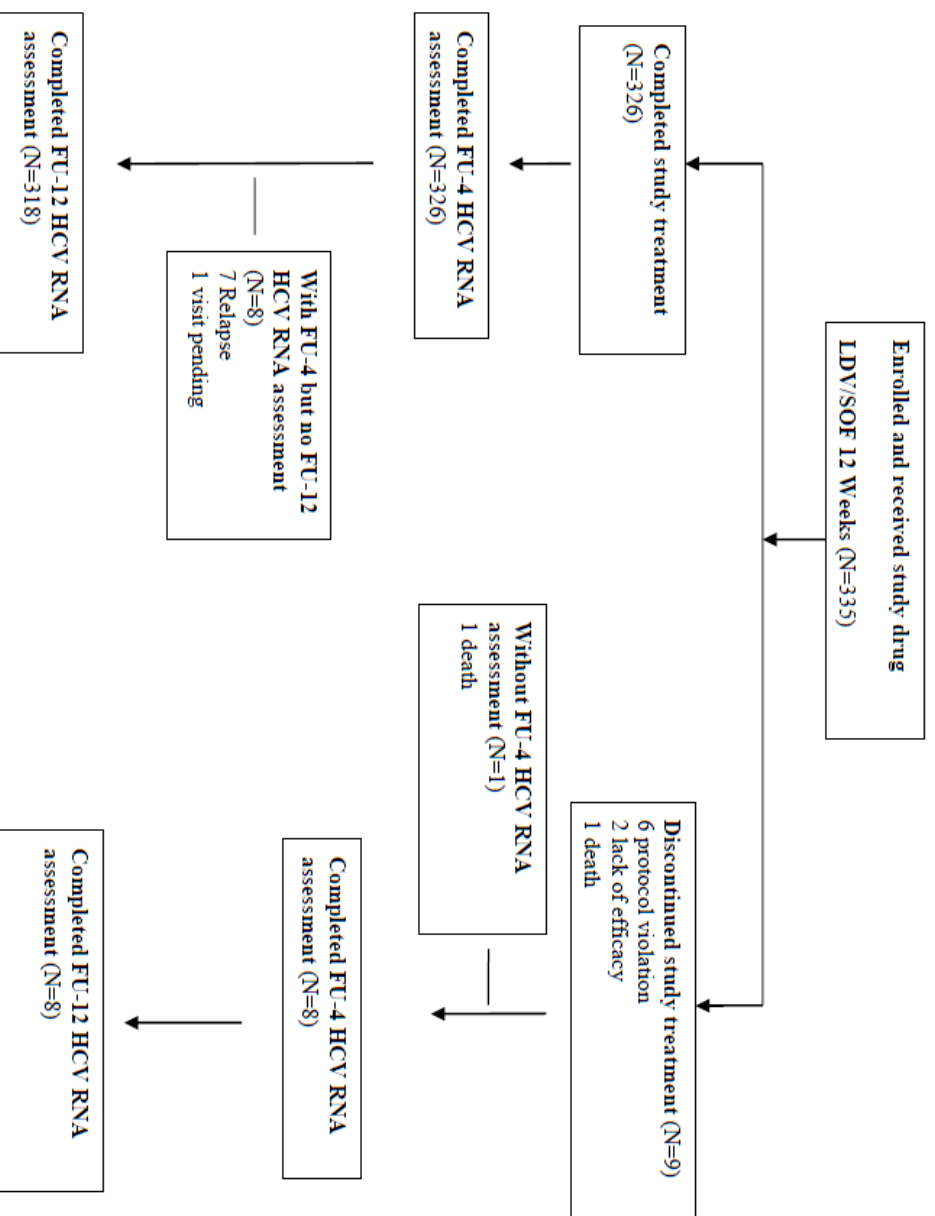



**Table S2. Prior HCV treatment and response**

|                              | <b>LDV-SOF<br/>(N=335)</b> |
|------------------------------|----------------------------|
| <b>Treatment-naïve</b>       | 150 (49%)                  |
| Interferon eligible          | 132 (88%)                  |
| Interferon ineligible        | 18 (12%)                   |
| <b>Treatment-experienced</b> | 185 (55%)                  |
| DAA+PEG+RBV                  | 53 (29%)                   |
| Treatment intolerant         | 6 (11%)                    |
| Relapser/breakthrough        | 18 (34%)                   |
| Non-responder                | 29 (55%)                   |
| PEG+RBV                      | 113 (61%)                  |
| Treatment intolerant         | 14 (12%)                   |
| Relapser/breakthrough        | 41 (36%)                   |
| Non-responder                | 58 (51%)                   |
| Null responder               | 40 (69%)                   |
| Partial responder or unknown | 18 (31%)                   |
| DAA+RBV                      | 14 (8%)                    |
| Relapser/breakthrough        | 14 (100%)                  |
| <b>Other</b>                 | 5 (3%)                     |
| Treatment intolerant         | 1 (20%)                    |
| Non-responder                | 3 (60%)                    |
| Partial responder or unknown | 1 (20%)                    |
| Undetermined                 | 1 (20%)                    |

**Table S3. SVR12 by subgroup**

|                                       | <b>LDV/SOF+<br/>EFV+FTC+TDF<br/>(N=160)</b> | <b>LDV/SOF+<br/>RAL+FTC+TDF<br/>(N=146)</b> | <b>LDV/SOF+<br/>RPV+FTC+TDF<br/>(N=29)</b> | <b>LDV/SOF<br/>Total<br/>(N=335)</b> |
|---------------------------------------|---------------------------------------------|---------------------------------------------|--------------------------------------------|--------------------------------------|
| <b>Overall</b>                        | 151/160 (94.4%)                             | 143/146 (97.9%)                             | 28/29 (96.6%)                              | 322/335 (96.1%)                      |
| 95% CI                                | 89.6% to 97.4%                              | 94.1% to 99.6%                              | 82.2% to 99.9%                             | 93.5% to 97.9%                       |
| <b>Age at Baseline (Years)</b>        |                                             |                                             |                                            |                                      |
| <65                                   | 146/154 (94.8%)                             | 134/137 (97.8%)                             | 28/29 (96.6%)                              | 308/320 (96.3%)                      |
| 95% CI                                | 90.0% to 97.7%                              | 93.7% to 99.5%                              | 82.2% to 99.9%                             | 93.5% to 98.0%                       |
| ≥65                                   | 5/6 (83.3%)                                 | 9/9 (100.0%)                                | 0/0                                        | 14/15 (93.3%)                        |
| 95% CI                                | 35.9% to 99.6%                              | 66.4% to 100.0%                             | 24/24 (100.0%)                             | 68.1% to 99.8%                       |
| <b>Sex at Birth</b>                   |                                             |                                             |                                            |                                      |
| Male                                  | 120/128 (93.8%)                             | 122/124 (98.4%)                             | 85.8% to 100.0%                            | 266/276 (96.4%)                      |
| 95% CI                                | 88.1% to 97.3%                              | 94.3% to 99.8%                              | 4/5 (80.0%)                                | 93.4% to 98.2%                       |
| Female                                | 31/32 (96.9%)                               | 21/22 (95.5%)                               | 28.4% to 99.5%                             | 56/59 (94.9%)                        |
| 95% CI                                | 83.8% to 99.9%                              | 77.2% to 99.9%                              | 9/10 (90.0%)                               | 85.9% to 98.9%                       |
| <b>Race</b>                           |                                             |                                             |                                            |                                      |
| Black                                 | 52/61 (85.2%)                               | 42/44 (95.5%)                               | 55.5% to 99.7%                             | 103/115 (89.6%)                      |
| 95% CI                                | 73.8% to 93.0%                              | 84.5% to 99.4%                              | 18/18 (100.0%)                             | 82.5% to 94.5%                       |
| Non-Black                             | 97/97 (100.0%)                              | 101/102 (99.0%)                             | 81.5% to 100.0%                            | 216/217 (99.5%)                      |
| 95% CI                                | 96.3% to 100.0%                             | 94.7% to 100.0%                             | 28/29 (96.6%)                              | 97.5% to 100.0%                      |
| <b>HCV Genotype</b>                   |                                             |                                             |                                            |                                      |
| 1a                                    | 101/108 (93.5%)                             | 114/117 (97.4%)                             | 25/25 (100.0%)                             | 240/250 (96.0%)                      |
| 95% CI                                | 87.1% to 97.4%                              | 92.7% to 99.5%                              | 86.3% to 100.0%                            | 92.8% to 98.1%                       |
| 1b                                    | 43/45 (95.6%)                               | 28/28 (100.0%)                              | 3/4 (75.0%)                                | 74/77 (96.1%)                        |
| 95% CI                                | 84.9% to 99.5%                              | 87.7% to 100.0%                             | 19.4% to 99.4%                             | 89.0% to 99.2%                       |
| 4                                     | 7/7 (100.0%)                                | 1/1 (100.0%)                                | 0/0                                        | 8/8 (100.0%)                         |
| 95% CI                                | 59.0% to 100.0%                             | 2.5% to 100.0%                              |                                            | 63.1% to 100.0%                      |
| <b>Cirrhosis</b>                      |                                             |                                             |                                            |                                      |
| No                                    | 130/137 (94.9%)                             | 104/105 (99.0%)                             | 25/26 (96.2%)                              | 259/268 (96.6%)                      |
| 95% CI                                | 89.8% to 97.9%                              | 94.8% to 100.0%                             | 80.4% to 99.9%                             | 93.7% to 98.5%                       |
| Yes                                   | 21/23 (91.3%)                               | 39/41 (95.1%)                               | 3/3 (100.0%)                               | 63/67 (94.0%)                        |
| 95% CI                                | 72.0% to 98.9%                              | 83.5% to 99.4%                              | 29.2% to 100.0%                            | 85.4% to 98.3%                       |
| <b>Prior HCV Treatment Experience</b> |                                             |                                             |                                            |                                      |
| Naive                                 | 69/72 (95.8%)                               | 59/62 (95.2%)                               | 15/16 (93.8%)                              | 143/150 (95.3%)                      |
| 95% CI                                | 88.3% to 99.1%                              | 86.5% to 99.0%                              | 69.8% to 99.8%                             | 90.6% to 98.1%                       |
| Experienced                           | 82/88 (93.2%)                               | 84/84 (100.0%)                              | 13/13 (100.0%)                             | 179/185 (96.8%)                      |
| 95% CI                                | 85.7% to 97.5%                              | 95.7% to 100.0%                             | 75.3% to 100.0%                            | 93.1% to 98.8%                       |
| <b>Baseline HCV RNA (IU/mL)</b>       |                                             |                                             |                                            |                                      |
| <800,000                              | 16/16 (100.0%)                              | 19/19 (100.0%)                              | 1/1 (100.0%)                               | 36/36 (100.0%)                       |
| 95% CI                                | 79.4% to 100.0%                             | 82.4% to 100.0%                             | 2.5% to 100.0%                             | 90.3% to 100.0%                      |
| ≥800,000                              | 135/144 (93.8%)                             | 124/127 (97.6%)                             | 27/28 (96.4%)                              | 286/299 (95.7%)                      |
| 95% CI                                | 88.5% to 97.1%                              | 93.3% to 99.5%                              | 81.7% to 99.9%                             | 92.7% to 97.7%                       |

**Table S3. SVR12 by subgroup (continued)**

| <b>Baseline BMI (kg/m<sup>2</sup>)</b>                       |                 |                 |                 |                 |
|--------------------------------------------------------------|-----------------|-----------------|-----------------|-----------------|
| <30                                                          | 120/127 (94.5%) | 108/109 (99.1%) | 22/23 (95.7%)   | 250/259 (96.5%) |
| 95% CI                                                       | 89.0% to 97.8%  | 95.0% to 100.0% | 78.1% to 99.9%  | 93.5% to 98.4%  |
| ≥30                                                          | 31/33 (93.9%)   | 35/37 (94.6%)   | 6/6 (100.0%)    | 72/76 (94.7%)   |
| 95% CI                                                       | 79.8% to 99.3%  | 81.8% to 99.3%  | 54.1% to 100.0% | 87.1% to 98.5%  |
| <b>Baseline ALT</b>                                          |                 |                 |                 |                 |
| ≤1.5 x ULN                                                   | 95/98 (96.9%)   | 79/81 (97.5%)   | 18/19 (94.7%)   | 192/198 (97.0%) |
| 95% CI                                                       | 91.3% to 99.4%  | 91.4% to 99.7%  | 74.0% to 99.9%  | 93.5% to 98.9%  |
| >1.5 x ULN                                                   | 56/62 (90.3%)   | 64/65 (98.5%)   | 10/10 (100.0%)  | 130/137 (94.9%) |
| 95% CI                                                       | 80.1% to 96.4%  | 91.7% to 100.0% | 69.2% to 100.0% | 89.8% to 97.9%  |
| <b>IL28B</b>                                                 |                 |                 |                 |                 |
| CC                                                           | 37/37 (100.0%)  | 39/40 (97.5%)   | 4/4 (100.0%)    | 80/81 (98.8%)   |
| 95% CI                                                       | 90.5% to 100.0% | 86.8% to 99.9%  | 39.8% to 100.0% | 93.3% to 100.0% |
| Non-CC                                                       | 114/123 (92.7%) | 104/106 (98.1%) | 24/25 (96.0%)   | 242/254 (95.3%) |
| 95% CI                                                       | 86.6% to 96.6%  | 93.4% to 99.8%  | 79.6% to 99.9%  | 91.9% to 97.5%  |
| CT                                                           | 79/82 (96.3%)   | 83/84 (98.8%)   | 19/19 (100.0%)  | 181/185 (97.8%) |
| 95% CI                                                       | 89.7% to 99.2%  | 93.5% to 100.0% | 82.4% to 100.0% | 94.6% to 99.4%  |
| TT                                                           | 35/41 (85.4%)   | 21/22 (95.5%)   | 5/6 (83.3%)     | 61/69 (88.4%)   |
| 95% CI                                                       | 70.8% to 94.4%  | 77.2% to 99.9%  | 35.9% to 99.6%  | 78.4% to 94.9%  |
| <b>Baseline CD4 Counts (cells/μL)</b>                        |                 |                 |                 |                 |
| <350                                                         | 13/14 (92.9%)   | 18/19 (94.7%)   | 4/4 (100.0%)    | 35/37 (94.6%)   |
| 95% CI                                                       | 66.1% to 99.8%  | 74.0% to 99.9%  | 39.8% to 100.0% | 81.8% to 99.3%  |
| ≥350                                                         | 138/146 (94.5%) | 125/127 (98.4%) | 24/25 (96.0%)   | 287/298 (96.3%) |
| 95% CI                                                       | 89.5% to 97.6%  | 94.4% to 99.8%  | 79.6% to 99.9%  | 93.5% to 98.1%  |
| <b>Prior HCV Treatment Experience for Cirrhotic Subjects</b> |                 |                 |                 |                 |
| Naive                                                        | 5/6 (83.3%)     | 11/13 (84.6%)   | 1/1 (100.0%)    | 17/20 (85.0%)   |
| 95% CI                                                       | 35.9% to 99.6%  | 54.6% to 98.1%  | 2.5% to 100.0%  | 62.1% to 96.8%  |
| Experienced                                                  | 16/17 (94.1%)   | 28/28 (100.0%)  | 2/2 (100.0%)    | 46/47 (97.9%)   |
| 95% CI                                                       | 71.3% to 99.9%  | 87.7% to 100.0% | 15.8% to 100.0% | 88.7% to 99.9%  |
| <b>Most Recent HCV Treatment Regimen</b>                     |                 |                 |                 |                 |
| DAA+PEG+RBV                                                  | 18/19 (94.7%)   | 32/32 (100.0%)  | 2/2 (100.0%)    | 52/53 (98.1%)   |
| 95% CI                                                       | 74.0% to 99.9%  | 89.1% to 100.0% | 15.8% to 100.0% | 89.9% to 100.0% |
| PEG+RBV                                                      | 52/57 (91.2%)   | 45/45 (100.0%)  | 11/11 (100.0%)  | 108/113 (95.6%) |
| 95% CI                                                       | 80.7% to 97.1%  | 92.1% to 100.0% | 71.5% to 100.0% | 90.0% to 98.5%  |
| DAA+RBV                                                      | 11/11 (100.0%)  | 3/3 (100.0%)    | 0/0             | 14/14 (100.0%)  |
| 95% CI                                                       | 71.5% to 100.0% | 29.2% to 100.0% |                 | 76.8% to 100.0% |
| Other                                                        | 1/1 (100.0%)    | 4/4 (100.0%)    | 0/0             | 5/5 (100.0%)    |
| 95% CI                                                       | 2.5% to 100.0%  | 39.8% to 100.0% |                 | 47.8% to 100.0% |

## Figure S2. Rates of Sustained Virologic Response by Subgroup and Baseline Factors

The position of the square indicates the rate of virologic response 12 weeks after the end of treatment in the subgroup. Horizontal lines indicate 95% confidence intervals. The vertical line represents the overall rate of sustained virologic response.

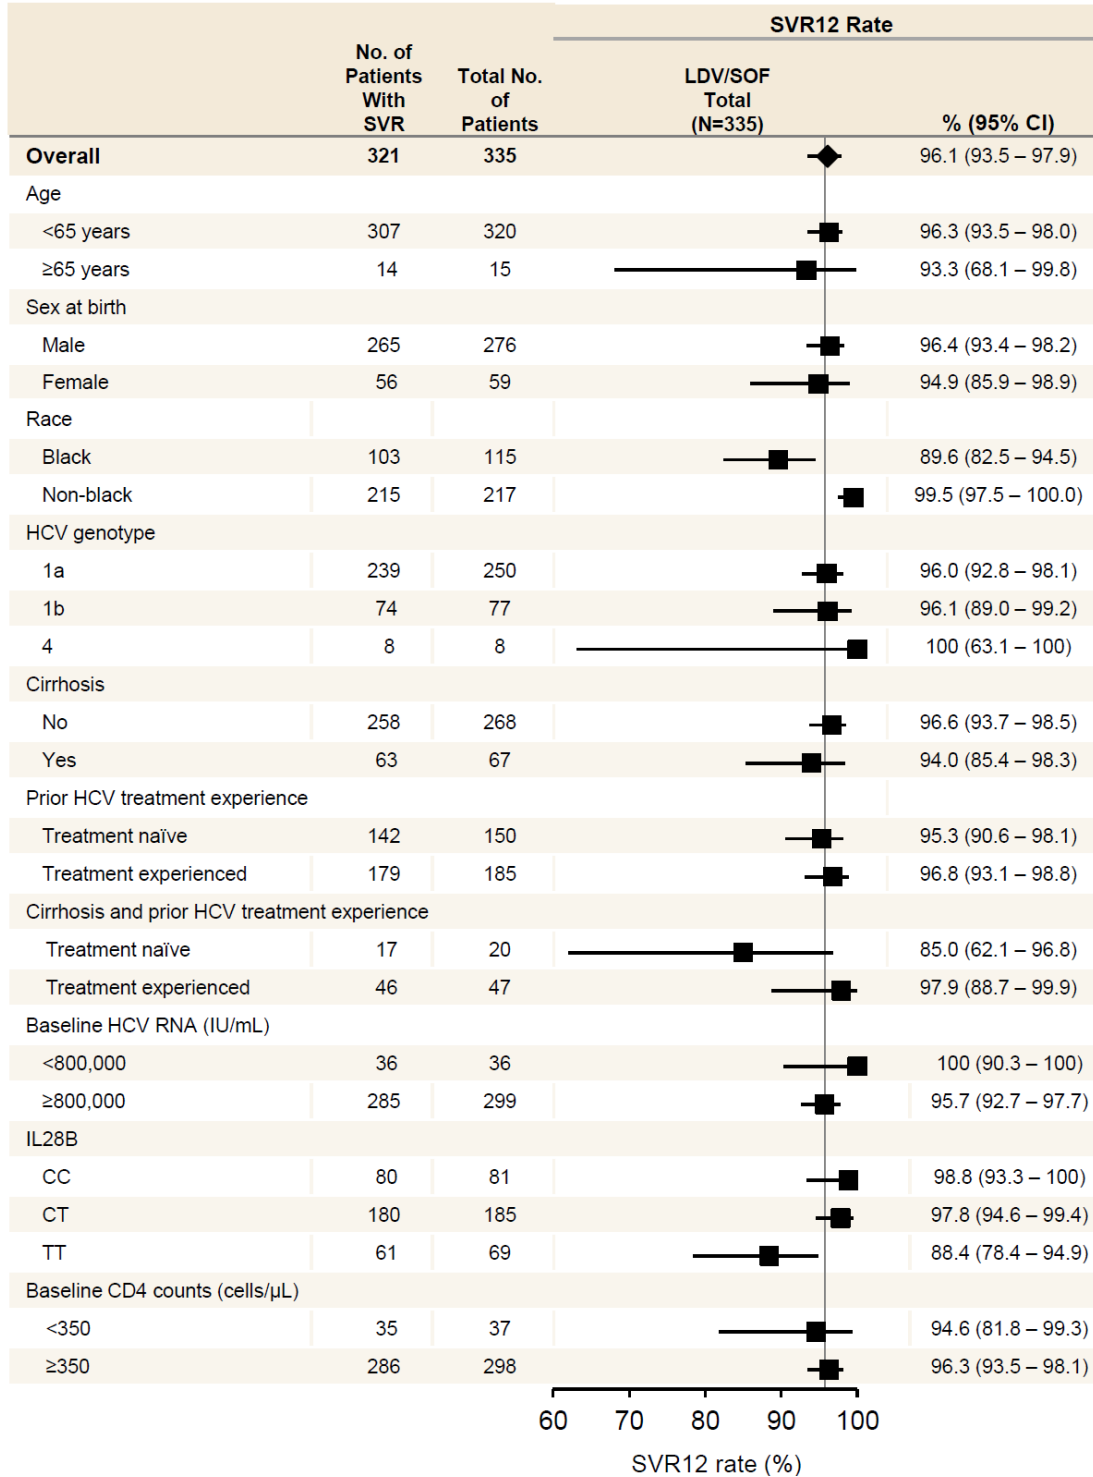

**Table S4. Characteristics of patients who did not achieve SVR12**

| <b>Response</b>          | <b>Age</b> | <b>Sex</b> | <b>Race</b> | <b>BMI</b> | <b>Genotype</b> | <b>Baseline CD4 count</b> | <b>Cirrhosis</b> | <b>IL28B</b> | <b>HCV RNA</b> | <b>Timing of VF</b> | <b>Prior HCV treatment</b> | <b>ARV Regimen</b> |
|--------------------------|------------|------------|-------------|------------|-----------------|---------------------------|------------------|--------------|----------------|---------------------|----------------------------|--------------------|
| Breakthrough/<br>rebound | 60         | F          | Black       | 22.5       | 1b              | 837                       | No               | TT           | 6.4            | Week 8              | N/A                        | RPV+FTC+TDF        |
|                          | 53         | M          | Black       | 23.7       | 1a              | 391                       | No               | CT           | 6.4            | Week 6              | N/A                        | EFV+FTC+TDF        |
| Relapse                  | 35         | M          | Black       | 24.1       | 1a              | 308                       | No               | CT           | 7.3            | FU Week 4           | N/A                        | EFV+FTC+TDF        |
|                          | 58         | M          | Black       | 28.2       | 1a              | 553                       | No               | TT           | 7.5            | FU Week 4           | PEG+RBV                    | EFV+FTC+TDF        |
|                          | 61         | M          | Black       | 22.4       | 1a              | 504                       | Yes              | TT           | 7.0            | FU Week 4           | N/A                        | EFV+FTC+TDF        |
|                          | 61         | F          | Black       | 26.8       | 1a              | 144                       | Yes              | CT           | 6.4            | FU Week 12          | PEG+RBV                    | RAL+FTC+TDF        |
|                          | 51         | M          | Black       | 30.0       | 1a              | 964                       | No               | TT           | 6.5            | FU Week 4           | NS5A+PEG+RBV*              | EFV+FTC+TDF        |
|                          | 65         | F          | Black       | 24.8       | 1b              | 904                       | Yes              | TT           | 7.0            | FU Week 4           | N/A                        | EFV+FTC+TDF        |
|                          | 60         | M          | Black       | 32.3       | 1a              | 435                       | No               | TT           | 7.4            | FU Week 4           | N/A                        | RAL+FTC+TDF        |
|                          | 63         | M          | Black       | 42.7       | 1a              | 690                       | No               | TT           | 7.3            | FU Week 12          | PEG+RBV                    | EFV+FTC+TDF        |
|                          | 55         | M          | Black       | 32.5       | 1a              | 933                       | No               | CT           | 6.7            | FU Week 4           | PEG+RBV                    | EFV+FTC+TDF        |
|                          | 58         | M          | Black       | 24.8       | 1b              | 2069                      | No               | TT           | 7.3            | FU Week 4           | PEG+RBV                    | EFV+FTC+TDF        |

\*Prohibited prior HCV regimen resulting in an important protocol violation

**Table S5. SVR12 by Race and Antiretroviral Regimen**

|                               | <b>LDV/SOF+<br/>EFV+FTC+TDF<br/>(N=160)</b> | <b>LDV/SOF+<br/>RAL+FTC+TDF<br/>(N=146)</b> | <b>LDV/SOF+<br/>RPV+FTC+TDF<br/>(n=29)</b> | <b>LDV/SOF<br/>Overall<br/>(N=335)</b> |
|-------------------------------|---------------------------------------------|---------------------------------------------|--------------------------------------------|----------------------------------------|
| <b>Black patients (%)</b>     | 52/61 (85)                                  | 42/44 (95)                                  | 9/10 (90)                                  | 103/115 (90)                           |
| <b>95% CI</b>                 | 74 to 93                                    | 85 to 99                                    | 56 to >99                                  | 83 to 95                               |
| <b>Non-black patients (%)</b> | 97/97 (100)                                 | 100/102 (98)                                | 18/18 (100)                                | 215/217 (99)                           |
| <b>95% CI</b>                 | 96 to 100                                   | 93 to 99                                    | 82 to 100                                  | 96 to >99                              |

## Exact logistic regression analysis for evaluating associations between baseline characteristics and virologic relapse

Univariate exact logistic regression analysis was performed to assess the relationship between virologic relapse and 15 baseline demographic and clinical factors: (<65 or ≥65 years old), sex, race (black or non-black), ethnicity (Hispanic/Latino or not Hispanic/Latino), HCV genotype (1a vs 4 or 1b vs 4), cirrhosis (yes or no), prior HCV treatment (treatment naive or treatment experienced), baseline HCV RNA viral load (<800,000 IU/mL or ≥800,000 IU/mL), BMI (<30 or ≥30 kg/m<sup>2</sup>), baseline ALT (≤ or >1.5 × ULN) IL28B allele (TT or non-TT), CD4 cell count (<200 or 200-349, <200 or 350-500, <200 or >500 cells/μL), ARV (FTC+TDF with EFV or non-EFV) and platelets (<125 or ≥125 × 10<sup>3</sup>/μL) and baseline creatinine clearance. Race, IL28B genotype, and ARV were included in the multivariate logistic regression model

**Table S6. Univariate Exact Logistic Regression in Assessing Factors Associated with Virologic Relapse**

| Variable                                        | Odds Ratio | 95% Confidence Limit | 2-Sided P-Value  |
|-------------------------------------------------|------------|----------------------|------------------|
| Age group (Years): <65                          | 0.409      | 0.05, 19.13          | 0.75             |
| Sex: female                                     | 1.19       | 0.12, 6.19           | 1.000            |
| Race: Black                                     | 28.95      | 4.59, infinity       | <b>&lt;0.001</b> |
| Ethnicity: Hispanic or Latino                   | 0.34       | 0, 2.18              | 0.3              |
| HCV Genotype: 1a or 4                           | 0.352      | 0.047, infinity      | 1.000            |
| HCV Genotype: 1b or 4                           | 0.25       | 0.019, infinity      | 1.000            |
| Cirrhosis: Yes                                  | 1.17       | 0.28, 7.84           | 0.65             |
| Prior HCV Treatment: Treatment Experienced      | 1.21       | 0.28, 5.92           | 1.000            |
| Baseline HCV RNA (IU/mL): <800,000              | 0.58       | 0, 3.73              | 0.63             |
| Baseline BMI (kg/m <sup>2</sup> ): <30          | 0.68       | 0.15, 4.19           | 0.82             |
| Baseline ALT (U/L): ≤1.5 × ULN                  | 0.46       | 0.093, 1.97          | 0.36             |
| IL28B: TT                                       | 9.92       | 2.19, 61.16          | <b>0.0016</b>    |
| Baseline CD4: <200 or 200-349 cells/μL          | 0.107      | 0.001, 9.8           | 0.41             |
| Baseline CD4: <200 or 350-500 cells/μL          | 0.058      | <0.001, 5.3          | 0.24             |
| Baseline CD4: <200 or >500 cells/μL             | 0.094      | 0.007, 5.5           | 0.26             |
| Baseline ARV: EFV or Non-EFV                    | 4.54       | 0.887, 44.51         | 0.0766           |
| Baseline platelets (×10 <sup>3</sup> /μL): ≥125 | 1.95       | 0.3, infinity        | 0.55             |
| Baseline CRCL (mL/min) (continuous)             | 0.999      | 0.978, 1.02          | 0.92             |

**Table S7. Multivariate Logistic Regression to Assess Association of Race, IL28B and ARV with Virologic Relapse**

| Variable    | Odds Ratio | 95% Confidence Limit | 2-Sided P-Value |
|-------------|------------|----------------------|-----------------|
| Race: Black | 17.73      | 2.66, infinity       | <b>0.0012</b>   |
| IL28B: TT   | 4.27       | 0.89, 27.5           | 0.0751          |
| ARV: EFV    | 3.26       | 0.59, 33.63          | 0.241           |

**Table S8. Serious adverse events**

|                                             | <b>LDV/SOF+<br/>EFV+FTC+TDF<br/>(N=160)</b> | <b>LDV/SOF+<br/>RAL+FTC+TDF<br/>(N=146)</b> | <b>LDV/SOF+<br/>RPV+FTC+TDF<br/>(n=29)</b> | <b>LDV/SOF<br/>Overall<br/>(N=335)</b> |
|---------------------------------------------|---------------------------------------------|---------------------------------------------|--------------------------------------------|----------------------------------------|
| Number (%) of Subjects Experiencing Any SAE | 4 (2.5%)                                    | 3 (2.1%)                                    | 1 (3.4%)                                   | 8 (2.4%)                               |
| Hepatocellular carcinoma                    | 1 (0.6%)                                    | 1 (0.7%)                                    | 0                                          | 2 (0.6%)                               |
| Portal vein thrombosis                      | 1 (0.6%)                                    | 1 (0.7%)                                    | 0                                          | 2 (0.6%)                               |
| Arthralgia                                  | 1 (0.6%)                                    | 0                                           | 0                                          | 1 (0.3%)                               |
| Azotaemia                                   | 1 (0.6%)                                    | 0                                           | 0                                          | 1 (0.3%)                               |
| Clostridium difficile colitis               | 0                                           | 1 (0.7%)                                    | 0                                          | 1 (0.3%)                               |
| Cough                                       | 1 (0.6%)                                    | 0                                           | 0                                          | 1 (0.3%)                               |
| Diarrhoea                                   | 0                                           | 0                                           | 1 (3.4%)                                   | 1 (0.3%)                               |
| Ileus                                       | 1 (0.6%)                                    | 0                                           | 0                                          | 1 (0.3%)                               |
| Peritonitis bacterial                       | 1 (0.6%)                                    | 0                                           | 0                                          | 1 (0.3%)                               |
| Respiratory tract infection                 | 0                                           | 1 (0.7%)                                    | 0                                          | 1 (0.3%)                               |
| Sepsis                                      | 0                                           | 1 (0.7%)                                    | 0                                          | 1 (0.3%)                               |
| Substance abuse                             | 1 (0.6%)                                    | 0                                           | 0                                          | 1 (0.3%)                               |



**Table S9. Grade 3 and 4 Laboratory abnormalities**

|                                        | LDV/SOF+<br>EFV+FTC+TDF<br>(N=160) | LDV/SOF+<br>RAL+FTC+TDF<br>(N=146) | LDV/SOF+<br>RPV+FTC+TDF<br>(n=29) | LDV/SOF<br>Overall<br>(N=335) |
|----------------------------------------|------------------------------------|------------------------------------|-----------------------------------|-------------------------------|
| <b>MAXIMUM POSTDOSE TOXICITY GRADE</b> |                                    |                                    |                                   |                               |
| Grade 3                                | 14 (8.8%)                          | 13 (8.9%)                          | 3 (10.3%)                         | 30 (9.0%)                     |
| Grade 4                                | 3 (1.9%)                           | 3 (2.1%)                           | 0                                 | 6 (1.8%)                      |
| <b>HEMATOLOGY</b>                      |                                    |                                    |                                   |                               |
| Hemoglobin                             | 160                                | 146                                | 29                                | 335                           |
| Grade 3                                | 1 (0.6%)                           | 0                                  | 0                                 | 1 (0.3%)                      |
| Grade 4                                | 0                                  | 0                                  | 0                                 | 0                             |
| Neutrophils                            | 160                                | 146                                | 29                                | 335                           |
| Grade 3                                | 1 (0.6%)                           | 0                                  | 0                                 | 1 (0.3%)                      |
| Grade 4                                | 0                                  | 0                                  | 0                                 | 0                             |
| Platelets                              | 160                                | 146                                | 29                                | 335                           |
| Grade 3                                | 0                                  | 0                                  | 0                                 | 0                             |
| Grade 4                                | 0                                  | 0                                  | 0                                 | 0                             |
| WBC                                    | 160                                | 146                                | 29                                | 335                           |
| Grade 3                                | 0                                  | 0                                  | 0                                 | 0                             |
| Grade 4                                | 0                                  | 0                                  | 0                                 | 0                             |
| <b>COAGULATION</b>                     |                                    |                                    |                                   |                               |
| APTT                                   | 157                                | 144                                | 29                                | 330                           |
| Grade 3                                | 0                                  | 0                                  | 0                                 | 0                             |
| Grade 4                                | 0                                  | 0                                  | 0                                 | 0                             |
| INR                                    | 157                                | 144                                | 29                                | 330                           |
| Grade 3                                | 0                                  | 0                                  | 0                                 | 0                             |
| Grade 4                                | 0                                  | 0                                  | 0                                 | 0                             |
| <b>CHEMISTRY</b>                       |                                    |                                    |                                   |                               |
| ALT                                    | 160                                | 146                                | 29                                | 335                           |
| Grade 3                                | 1 (0.6%)                           | 0                                  | 0                                 | 1 (0.3%)                      |
| Grade 4                                | 0                                  | 0                                  | 0                                 | 0                             |
| AST                                    | 160                                | 146                                | 29                                | 335                           |
| Grade 3                                | 0                                  | 1 (0.7%)                           | 0                                 | 1 (0.3%)                      |
| Grade 4                                | 0                                  | 0                                  | 0                                 | 0                             |
| Albumin                                | 160                                | 146                                | 29                                | 335                           |
| Grade 3                                | 0                                  | 0                                  | 0                                 | 0                             |

|                                |          |          |          |          |
|--------------------------------|----------|----------|----------|----------|
| Grade 4                        | 0        | 0        | 0        | 0        |
| Alkaline Phosphatase           | 160      | 146      | 29       | 335      |
| Grade 3                        | 0        | 0        | 0        | 0        |
| Grade 4                        | 0        | 0        | 0        | 0        |
| Creatine Kinase (CK)           | 160      | 146      | 29       | 335      |
| Grade 3                        | 2 (1.3%) | 1 (0.7%) | 0        | 3 (0.9%) |
| Grade 4                        | 1 (0.6%) | 1 (0.7%) | 0        | 2 (0.6%) |
| Creatinine                     | 160      | 146      | 29       | 335      |
| Grade 3                        | 0        | 0        | 0        | 0        |
| Grade 4                        | 0        | 0        | 0        | 0        |
| Lipase                         | 160      | 146      | 29       | 335      |
| Grade 3                        | 4 (2.5%) | 4 (2.7%) | 1 (3.4%) | 9 (2.7%) |
| Grade 4                        | 2 (1.3%) | 2 (1.4%) | 0        | 4 (1.2%) |
| Phosphate (Hypophosphatemia)   | 160      | 146      | 29       | 335      |
| Grade 3                        | 0        | 1 (0.7%) | 0        | 1 (0.3%) |
| Grade 4                        | 0        | 0        | 0        | 0        |
| Serum Bicarbonate              | 160      | 146      | 29       | 335      |
| Grade 3                        | 0        | 0        | 0        | 0        |
| Grade 4                        | 0        | 0        | 0        | 0        |
| Serum Glucose (Hyperglycemia)  | 160      | 146      | 29       | 335      |
| Grade 3                        | 0        | 5 (3.4%) | 0        | 5 (1.5%) |
| Grade 4                        | 0        | 0        | 0        | 0        |
| Serum Glucose (Hypoglycemia)   | 160      | 146      | 29       | 335      |
| Grade 3                        | 0        | 0        | 0        | 0        |
| Grade 4                        | 0        | 0        | 0        | 0        |
| Serum Potassium (Hyperkalemia) | 160      | 146      | 29       | 335      |
| Grade 3                        | 0        | 0        | 0        | 0        |
| Grade 4                        | 0        | 0        | 0        | 0        |
| Serum Potassium (Hypokalemia)  | 160      | 146      | 29       | 335      |
| Grade 3                        | 0        | 0        | 0        | 0        |
| Grade 4                        | 0        | 0        | 0        | 0        |
| Serum Sodium (Hypernatremia)   | 160      | 146      | 29       | 335      |
| Grade 3                        | 0        | 0        | 0        | 2 (0.6%) |
| Grade 4                        | 0        | 0        | 0        | 0        |
| Serum Sodium (Hyponatremia)    | 160      | 146      | 29       | 335      |
| Grade 3                        | 0        | 0        | 0        | 2 (0.6%) |

|                                      |          |          |          |          |
|--------------------------------------|----------|----------|----------|----------|
| Grade 4                              | 0        | 0        | 0        | 0        |
| Total Bilirubin (Hyperbilirubinemia) | 160      | 146      | 29       | 335      |
| Grade 3                              | 0        | 1 (0.7%) | 1 (3.4%) | 0        |
| Grade 4                              | 0        | 0        | 0        | 0        |
| Uric Acid (Hyperuricemia)            | 160      | 146      | 29       | 335      |
| Grade 3                              | 2 (1.3%) | 0        | 0        | 2 (0.6%) |
| Grade 4                              | 0        | 0        | 0        | 0        |
| Uric Acid (Hypouricemia)             | 160      | 146      | 29       | 335      |
| Grade 3                              | 0        | 0        | 0        | 2 (0.6%) |
| Grade 4                              | 0        | 0        | 0        | 0        |
| URINALYSIS                           |          |          |          |          |
| Hematuria (RBC counts)               | 57       | 43       | 12       | 112      |
| Grade 3                              | 2 (3.5%) | 0        | 0        | 2 (1.8%) |
| Grade 4                              | 0        | 0        | 0        | 0        |
| Urine Blood                          | 160      | 146      | 29       | 335      |
| Grade 3                              | 4 (2.5%) | 0        | 0        | 4 (1.2%) |
| Grade 4                              | 0        | 0        | 0        | 0        |
| Urine Glucose (Glycosuria)           | 160      | 146      | 29       | 335      |
| Grade 3                              | 0        | 3 (2.1%) | 1 (3.4%) | 4 (1.2%) |
| Grade 4                              | 0        | 0        | 0        | 0        |
| Urine Protein (Proteinuria)          | 160      | 146      | 29       | 335      |
| Grade 3                              | 0        | 0        | 0        | 0        |
| Grade 4                              | 0        | 0        | 0        | 0        |

Figure S3. Creatinine clearance

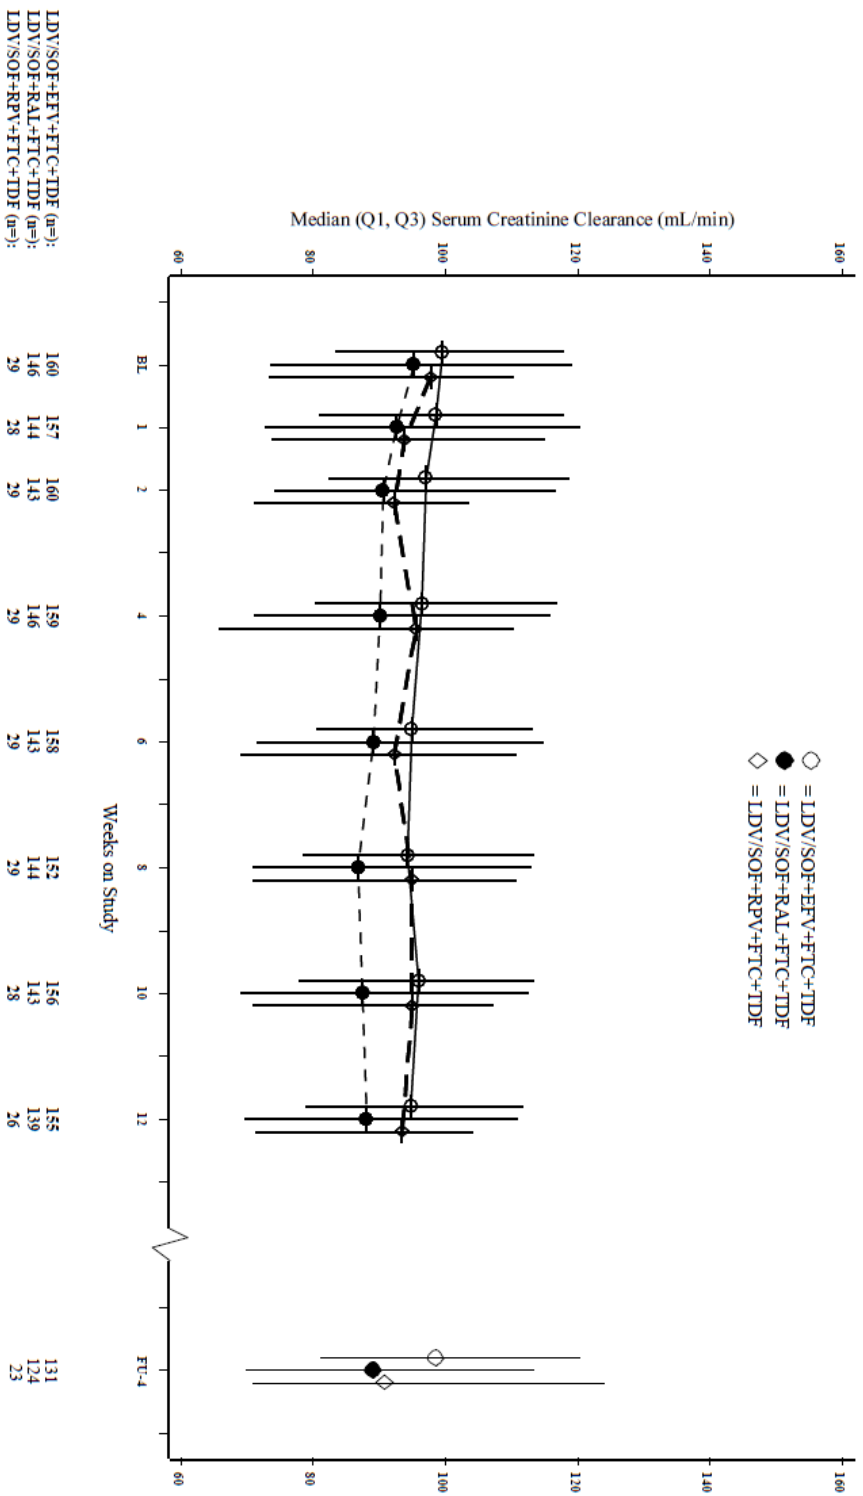

**Details regarding the four patients who had confirmed treatment-emergent increases of  $\geq 0.4$  mg/dL in serum creatinine**

One patient required discontinuation of tenofovir disoproxil fumarate during the study period. This patient was a 54 year-old man with diabetes mellitus type 1 since 1965, hypertension and hyperlipidemia. Since 1998, pre-study serum creatinine ranged 1.0-1.3 mg/dL and he had intermittent low level proteinuria and glycosuria. He entered the study on efavirenz/ tenofovir disoproxil fumarate/emtricitabine and developed worsening renal function and a clinical picture suggestive of renal tubular disease (see table below). This patient entered the study with baseline urine retinol binding protein/serum creatinine and urine beta-2 microglobulin/serum creatinine ratios significantly greater than that of the overall study population. Both urine biomarkers increased from baseline at weeks 2 and 4 but showed significant improvement by week 12. Following the switch to efavirenz, raltegravir, and renally dosed emtricitabine, renal function improved and there was some improvement in proteinuria; glucosuria persisted.

| Analysis Visit | Urine Glucose | Serum Glucose (mg/dL) | Creatinine Clearance (mL/min) | Serum Creatinine (mg/dL) | Serum Phosphate (mg/dL) | Urine Protein |
|----------------|---------------|-----------------------|-------------------------------|--------------------------|-------------------------|---------------|
| Baseline       | +4 (G3,H)     | 138 (G1,H)            | 79.5 (L)                      | 1.18                     | 3.3                     | +2 (G2,H)     |
| Baseline       | +4 (G3,H)     | 162 (G2,H)            | 78.8 (L)                      | 1.18                     | 2.6                     | +1 (G1,H)     |
| Week 1         | +4 (G3,H)     | 107 (H)               | 72.9 (L)                      | 1.26                     | 2.5                     | +2 (G2,H)     |
| Week 2         | +4 (G3,H)     | 173 (G2,H)            | 69.0 (L)                      | 1.33                     | 2.7                     | +2 (G2,H)     |
| Week 4         | +4 (G3,H)     | 150 (G1,H)            | 53.4 (L)                      | 1.71 (G1,H)              | 2.4                     | +2 (G2,H)     |
| Week 4         | +4 (G3,H)     | 132 (G1,H)            |                               | 1.88 (G1,H)              | 2.5                     | +2 (G2,H)     |
| Week 6         | +4 (G3,H)     | 123 (G1,H)            | 58.1 (L)                      | 1.60 (G1,H)              | 2.0 (G1,L)              | +2 (G2,H)     |
| Week 8         | +4 (G3,H)     | 107 (H)               | 64.2 (L)                      | 1.45 (H)                 | 2.3                     | +1 (G1,H)     |
| Week 10        | +4 (G3,H)     | 166 (G2,H)            | 65.6 (L)                      | 1.43 (H)                 | 2.8                     | +1 (G1,H)     |
| Week 12        | +3 (G2,H)     | 189 (G2,H)            | 68.4 (L)                      | 1.36 (H)                 | 2.8                     | +1 (G1,H)     |
| FU-4           | +4 (G3,H)     | 231 (G2,H)            | 63.3 (L)                      | 1.47 (H)                 | 2.4                     | +1 (G1,H)     |

One patient who entered the study on efavirenz/tenofovir disoproxil fumarate/emtricitabine with baseline chronic kidney disease and proteinuria developed trace-grade 1 glucosuria with

worsening renal function (see table below). This patient was a 47 year old man with no significant past medical history. His creatinine clearance remained >60 mL/min throughout the study and no changes in treatment for HIV or HCV was required. This patient entered the study with baseline urine retinol binding protein/serum creatinine ratio significantly greater than that of the overall study population and both urine retinol binding protein/serum creatinine and urine beta-2 microglobulin/serum creatinine ratios increased for this subject during the first two weeks of dosing and a peak at week 12; these biomarkers were trending down at the last follow-up visit.

| Analysis Visit | Urine Glucose | Serum Glucose (mg/dL) | Creatinine Clearance (mL/min) | Serum Creatinine (mg/dL) | Serum Phosphate (mg/dL) | Urine Protein |
|----------------|---------------|-----------------------|-------------------------------|--------------------------|-------------------------|---------------|
| Baseline       | Normal        | 78                    | 85.1                          | 1.50 (H)                 | 2.6                     | +1 (G1,H)     |
| Baseline       | Normal        | 90                    | 88.7                          | 1.42 (H)                 | 3.3                     | +1 (G1,H)     |
| Week 1         | Normal        | 85                    | 81.1 (L)                      | 1.56 (G1,H)              | 3.8                     | +1 (G1,H)     |
| Week 2         | Normal        | 86                    | 82.8 (L)                      | 1.55 (G1,H)              | 3.2                     | +2 (G2,H)     |
| Week 4         | Normal        | 94                    | 76.6 (L)                      | 1.65 (G1,H)              | 2.9                     | +2 (G2,H)     |
| Week 6         | Normal        | 92                    | 72.7 (L)                      | 1.74 (G1,H)              | 2.9                     | +1 (G1,H)     |
| Week 8         | Trace (H)     | 99                    | 76.4 (L)                      | 1.67 (G1,H)              | 2.7                     | +1 (G1,H)     |
| Week 10        | Trace (H)     | 91                    | 67.0 (L)                      | 1.88 (G1,H)              | 2.6                     | +1 (G1,H)     |
| Week 12        | Trace (H)     | 87                    | 74.1 (L)                      | 1.70 (G1,H)              | 2.8                     | +2 (G2,H)     |
| FU-4           | Trace (H)     | 87                    |                               | 1.80 (G1,H)              | 2.9                     | +2 (G2,H)     |

One patient who entered the study on efavirenz/tenofovir disoproxil fumarate/emtricitabine and with baseline chronic kidney disease and had sudden increase in serum creatinine to 2.40 mg/dL at Week 8 (see table below) with coincident elevations in creatine kinase, and urine blood without hematuria. There was no associated glucosuria and there was an isolated increase in proteinuria from 1+ at baseline to 2+ at week 8. The lab abnormalities were consistent with mild rhabdomyolysis in the setting of reported cocaine use. Laboratory abnormalities improved with hydration and no change in study drug. This was felt by the investigator to be unrelated to the study medication.

| Analysis Visit | Urine Glucose | Serum Glucose (mg/dL) | Creatinine Clearance (mL/min) | Serum Creatinine (mg/dL) | Serum Phosphate (mg/dL) | Urine Protein |
|----------------|---------------|-----------------------|-------------------------------|--------------------------|-------------------------|---------------|
| Baseline       | Normal        | 95                    | 65.0 (L)                      | 1.47 (H)                 | 3.9                     | +1 (G1,H)     |
| Baseline       | Normal        | 92                    | 49.0 (L)                      | 1.77 (G1,H)              | 3.5                     | Trace (H)     |
| Week 1         | Normal        | 95                    | 48.9 (L)                      | 1.77 (G1,H)              | 3.5                     | +1 (G1,H)     |
| Week 2         | Normal        | 90                    | 49.3 (L)                      | 1.77 (G1,H)              | 3.1                     | +1 (G1,H)     |
| Week 4         | Normal        | 82                    | 50.7 (L)                      | 1.73 (G1,H)              | 3.3                     | +1 (G1,H)     |
| Week 6         | Normal        | 97                    | 52.3 (L)                      | 1.68 (G1,H)              | 3.1                     | +1 (G1,H)     |
| Week 8         | Normal        | 109 (H)               | 35.7 (L)                      | 2.40 (G2,H)              | 3.0                     | +2 (G2,H)     |
| Week 8         | Normal        | 92                    | 39.1 (L)                      | 2.24 (G2,H)              | 2.7                     | +1 (G1,H)     |
| Week 10        | Normal        | 91                    | 47.6 (L)                      | 1.80 (G1,H)              | 2.9                     | +1 (G1,H)     |
| Week 12        | Normal        | 92                    | 45.4 (L)                      | 1.89 (G1,H)              | 2.8                     | +1 (G1,H)     |
| FU-4           | Normal        | 88                    | 49.0 (L)                      | 1.75 (G1,H)              | 3.4                     | +1 (G1,H)     |

One patient who entered the study on raltegravir and tenofovir disoproxil fumarate/emtricitabine had chronic kidney disease and a baseline creatinine clearance of 54.7 mL/min, which decreased to 45.1 mL/min at Week 2 (see table below). He did not develop glucosuria nor worsening of his baseline trace proteinuria. Per the package insert, this patient's tenofovir disoproxil fumarate/emtricitabine was changed to every other day dosing at that time. He was monitored closely during the study and completed without other changes to the ARV regimen or study drug.

| Analysis Visit | Urine Glucose | Serum Glucose (mg/dL) | Creatinine Clearance (mL/min) | Serum Creatinine (mg/dL) | Serum Phosphate (mg/dL) | Urine Protein |
|----------------|---------------|-----------------------|-------------------------------|--------------------------|-------------------------|---------------|
| Baseline       | Normal        | 63 (G1,L)             | 60.6 (L)                      | 1.09                     | 2.3                     | Trace (H)     |
| Baseline       | Normal        | 97                    | 54.7 (L)                      | 1.19                     | 3.1                     | Trace (H)     |
| Week 1         | Normal        | 108 (H)               | 54.7 (L)                      | 1.19                     | 2.4                     | Trace (H)     |
| Week 2         | Normal        | 94                    | 49.2 (L)                      | 1.34                     | 3.7                     | Negative      |
| Week 2         |               | 87                    | 45.1 (L)                      | 1.45 (H)                 | 2.3                     |               |
| Week 4         | Normal        | 67 (L)                | 46.9 (L)                      | 1.40 (H)                 | 3.3                     | Trace (H)     |
| Week 6         |               | 83                    | 47.8 (L)                      | 1.38 (H)                 | 3.0                     |               |
| Week 6         | Normal        | 86                    | 47.8 (L)                      | 1.38 (H)                 | 3.0                     | Negative      |
| Week 8         |               | 81                    | 48.5 (L)                      | 1.36 (H)                 | 2.7                     |               |
| Week 8         | Normal        | 88                    | 44.6 (L)                      | 1.51 (G1,H)              | 3.3                     | Trace (H)     |
| Week 10        |               | 100                   | 48.0 (L)                      | 1.40 (H)                 | 3.0                     |               |
| Week 10        | Normal        | 92                    | 49.8 (L)                      | 1.33                     | 3.8                     | Trace (H)     |
| Week 12        | Normal        | 90                    | 58.7 (L)                      | 1.16                     | 3.6                     | Negative      |
| FU-4           | Normal        | 92                    | 52.0 (L)                      | 1.31                     | 3.0                     | Trace (H)     |

**Table S10. Pharmacokinetic Parameters of Ledipasvir, Sofosbuvir, GS-331007, and Tenofovir by ARV regimen and Overall**

| Mean (%CV)                    | LDV/SOF+<br>EFV+FTC+TDF<br>12 Weeks<br>(N = 160) | LDV/SOF+<br>RAL+FTC+TDF<br>12 Weeks<br>(N = 146) | LDV/SOF+<br>RPV+FTC+TDF<br>12 Weeks<br>(N = 29) | LDV/SOF<br>Total<br>12 Weeks<br>(N = 335) |
|-------------------------------|--------------------------------------------------|--------------------------------------------------|-------------------------------------------------|-------------------------------------------|
| <b>SOFOSBUVIR</b>             |                                                  |                                                  |                                                 |                                           |
| AUC <sub>tau</sub> (ng•hr/mL) | 1303.6 (23.1)                                    | 1328.8 (24.5)                                    | 1374.8 (23.0)                                   | 1320.7 (23.7)                             |
| C <sub>max</sub> (ng/mL)      | 704.7 (24.1)                                     | 696.0 (28.5)                                     | 647.2 (31.4)                                    | 695.9 (26.7)                              |
| <b>GS-331007</b>              |                                                  |                                                  |                                                 |                                           |
| AUC <sub>tau</sub> (ng•hr/mL) | 13048.2 (27.2)                                   | 13836.6 (27.7)                                   | 13655.0 (27.7)                                  | 13444.3 (27.6)                            |
| C <sub>max</sub> (ng/mL)      | 821.6 (27.3)                                     | 859.1 (29.2)                                     | 822.3 (30.9)                                    | 838.0 (28.5)                              |
| <b>LEDIPASVIR</b>             |                                                  |                                                  |                                                 |                                           |
| AUC <sub>tau</sub> (ng•hr/mL) | 6076.8 (52.0)                                    | 5719.5 (56.5)                                    | 6433.4 (50.3)                                   | 5951.9 (53.7)                             |
| C <sub>max</sub> (ng/mL)      | 282.0 (48.5)                                     | 251.8 (46.6)                                     | 281.9 (49.5)                                    | 268.8 (48.1)                              |
| C <sub>tau</sub> (ng/mL)      | 179.5 (57.4)                                     | 162.3 (55.0)                                     | 187.3 (53.3)                                    | 172.7 (56.3)                              |
| <b>TENOFOVIR</b>              |                                                  |                                                  |                                                 |                                           |
| AUC <sub>tau</sub> (ng•hr/mL) | 3,600.7 (30.3)                                   | 4,010.0 (30.9)                                   | 4,286.6 (30.8)                                  | 3,838.5 (31.2)                            |
| C <sub>max</sub> (ng/mL)      | 335.7 (20.2)                                     | 378.9 (29.9)                                     | 379.5 (25.4)                                    | 358.3 (26.5)                              |
| C <sub>tau</sub> (ng/mL)      | 86.7 (47.5)                                      | 99.8 (45.1)                                      | 111.7 (42.4)                                    | 94.6 (46.6)                               |
